# Supplementary material for: Therapeutic potential of recombinant IL-22BP in psoriasis: suppression of IL-22/STAT3 signaling in mice
Source: Research Square preprint supplement (doi:10.21203/rs.3.rs-6841372/v1), 2025-06-20
Supplement: Supplementary file 1 [file 25445400cfb61e4c1181f77f.docx]

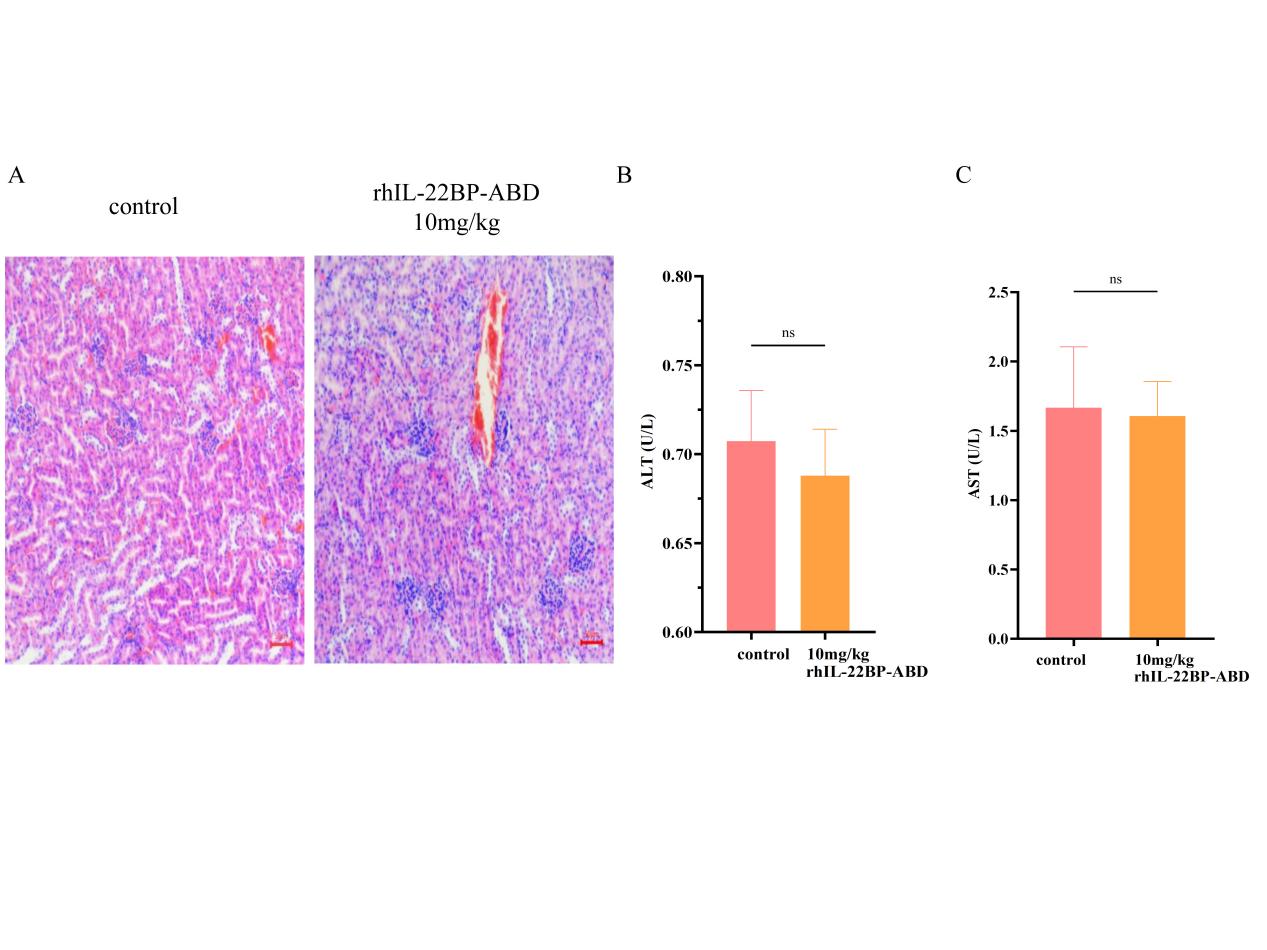


**Supplementary data 2 rhIL-22BP-ABD has no significant toxic effect on normal wild-type mice. A** Representative images of H&E-stained kidney sections in normal mice injected with 20 mM Tris-HCl or 10 mg/kg rhIL-22BP-ABD, respectively. **B** The content of serum ALT in normal mice injected with 20 mM Tris-HCl or 10 mg/kg rhIL-22BP-ABD respectively was compared by ELISA (n=5). **C** The content of serum ALT in normal mice after injection of 20 mM Tris-HCl and 10 mg/kg rhIL-22BP-ABD respectively was compared by ELISA (n=5).
